# Supplementary material for: Hidden vortices: near-equatorial low-oxygen extremes driven by high-baroclinic-mode vortices
Source: Copernicus journal article supplement (doi:10.5194/os-22-119-2026), 2026-01-13
Supplement: Supplementary file 1 [file os-22-119-2026-supplement.pdf]

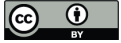

*Supplement of*

## **Hidden vortices: near-equatorial low-oxygen extremes driven by high-baroclinic-mode vortices**

**Florian Schütte et al.**

*Correspondence to:* Florian Schütte (fschuette@geomar.de)

The copyright of individual parts of the supplement might differ from the article licence.

## Low-oxygen events linked to subsurface eddies & also evident in long-term moorings

Low DO events below  $60 \mu\text{mol kg}^{-1}$  in the upper 200 m have been observed through repeated shipboard measurements and multi-year moored observations (Figure 1 or Table 1 in the main manuscript) in the near-equatorial ( $6^\circ$ -  $12^\circ\text{N}$ ) open ocean of the eastern tropical North Atlantic. Across all depths in the long-term DO time series from moored observations at  $4^\circ\text{N}$ ,  $11^\circ\text{N}$ , and  $20^\circ\text{N}$  (all at  $23^\circ\text{W}$ ), recurring dips in DO are observed that fall significantly below the climatological mean (see Fig. 1 or examples at  $23^\circ\text{W}/11^\circ\text{N}$  at 500 m and  $23^\circ\text{W}/4^\circ\text{N}$  at 80 m in Fig. 3 a,b of the main manuscript). About 60% of all low DO events (70% from shipboard, 50% from moored observations) can be directly linked to anticyclonic and cyclonic subsurface eddies. The other available long-term time series from moored oxygen sensors in the eastern tropical north Atlantic (not shown in full length the main manuscript) are as follows (Fig. S1):

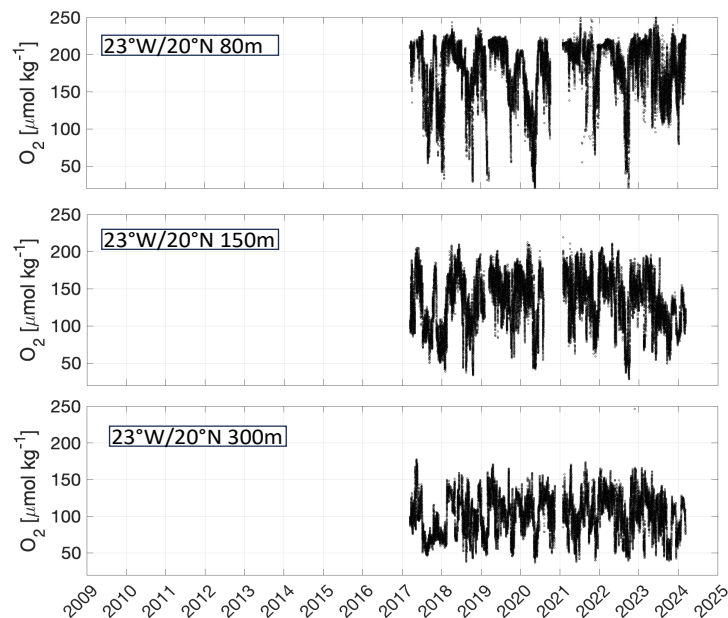

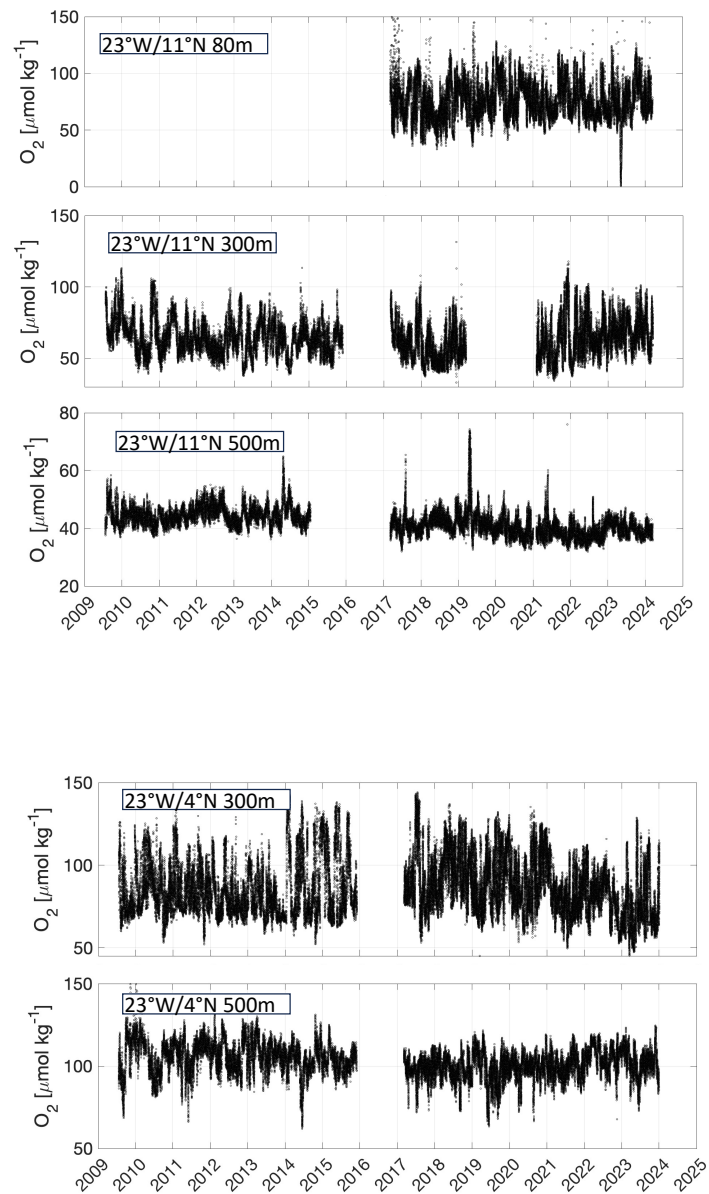

**Figure S1:** Oxygen time series along 23°W - at the top: 20°N (80 m, 150 m, and 300 m depth); in the middle: 11°N (80 m, 300 m, and 500 m depth); and at the bottom: 4°N (300 m and 500 m depth). Each panel shows dissolved oxygen ( $\mu\text{mol kg}^{-1}$ ) as a function of time.
